# Supplementary material
Source: PubMed Central journal article supplement (PMC4268417)
Supplement: NIHMS640439-supplement.pdf [file NIHMS640439-supplement.pdf]

**ThermoMouse: an *in vivo* model to identify modulators of UCP1 expression in brown adipose tissue**

Andrea Galmozzi<sup>2\*</sup>, Si B. Sonne<sup>1,3\*</sup>, Svetlana Keylin<sup>1</sup>, Yutaka Hasegawa<sup>1</sup>, Kosaku Shinoda<sup>1</sup>, Ineke Luijten<sup>1,4</sup>, Jae Won Chang<sup>2</sup>, Louis Z. Sharp<sup>1</sup>, Benjamin F. Cravatt<sup>2</sup>, Enrique Saez<sup>2</sup>, and Shingo Kajimura<sup>1</sup>

**SUPPLEMENTARY INFORMATION**

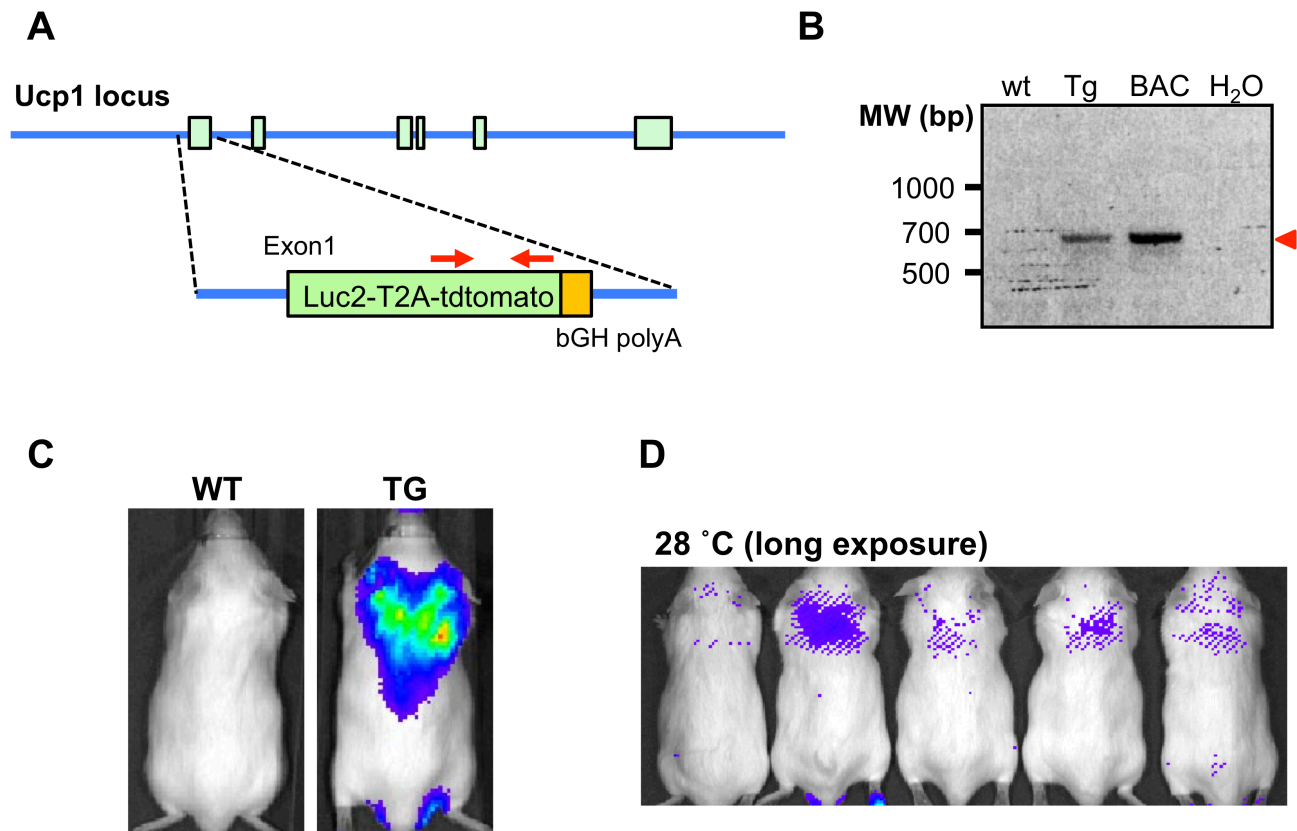

**Figure S1 related to Figure 1. Generation of *Ucp1*-luciferase reporter mice**

**A:** Genomic structure of the *Ucp1*-luciferase BAC transgene. The coding sequence of luciferase2-T2A-tdTomato followed by a bovine growth hormone (bGH)-derived polyadenylation signal (polyA) was inserted into the initiation codon of *Ucp1* located in exon 1.

**B:** BAC transgenic mice (Tg) were identified by PCR analysis using the primers shown as red arrows in (A). The BAC construct (BAC) was used as a positive control. Mouse wild-type (wt) DNA and water (H<sub>2</sub>O) were used as negative controls.

**C:** Luciferase signal in wild-type (wt) and *Ucp1*-luciferase transgenic mice (Tg) imaged using the IVIS Spectrum Imaging system at 9°C.

**D:** Long-exposure image of luciferase signal in *Ucp1*-luciferase reporter mice maintained at 28°C.

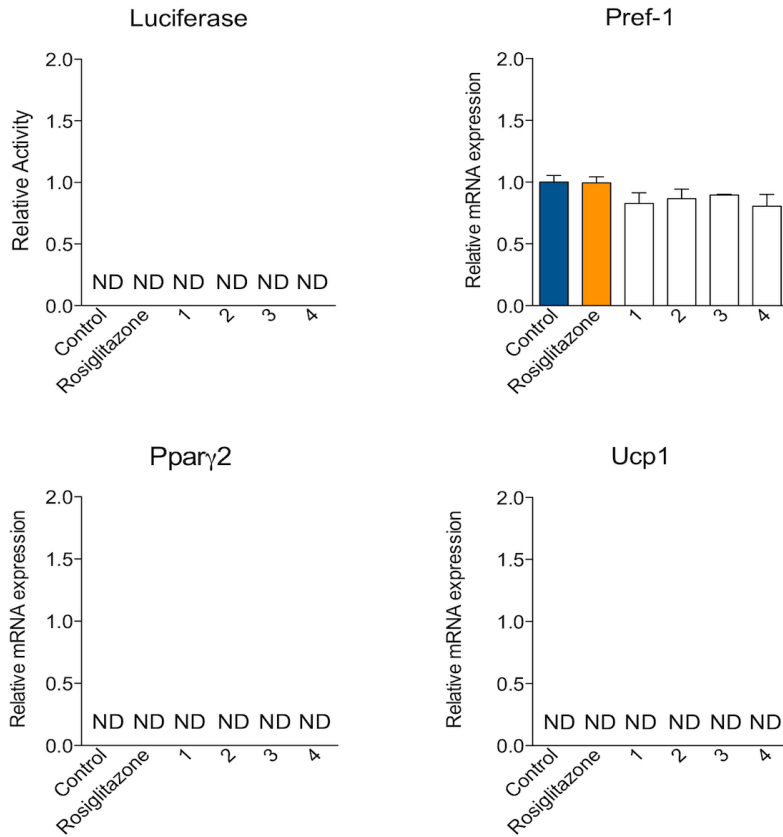

**Figure S2 related to Figure 3. Effect of screening hits on *Ucp1*-luciferase preadipocytes**  
 Subconfluent *Ucp1*-luciferase preadipocytes were treated with selected screen hits (10  $\mu$ M) or rosiglitazone (0.5  $\mu$ M) for 24 hr prior to luciferase and gene expression analysis (n=4). ND, not detectable.

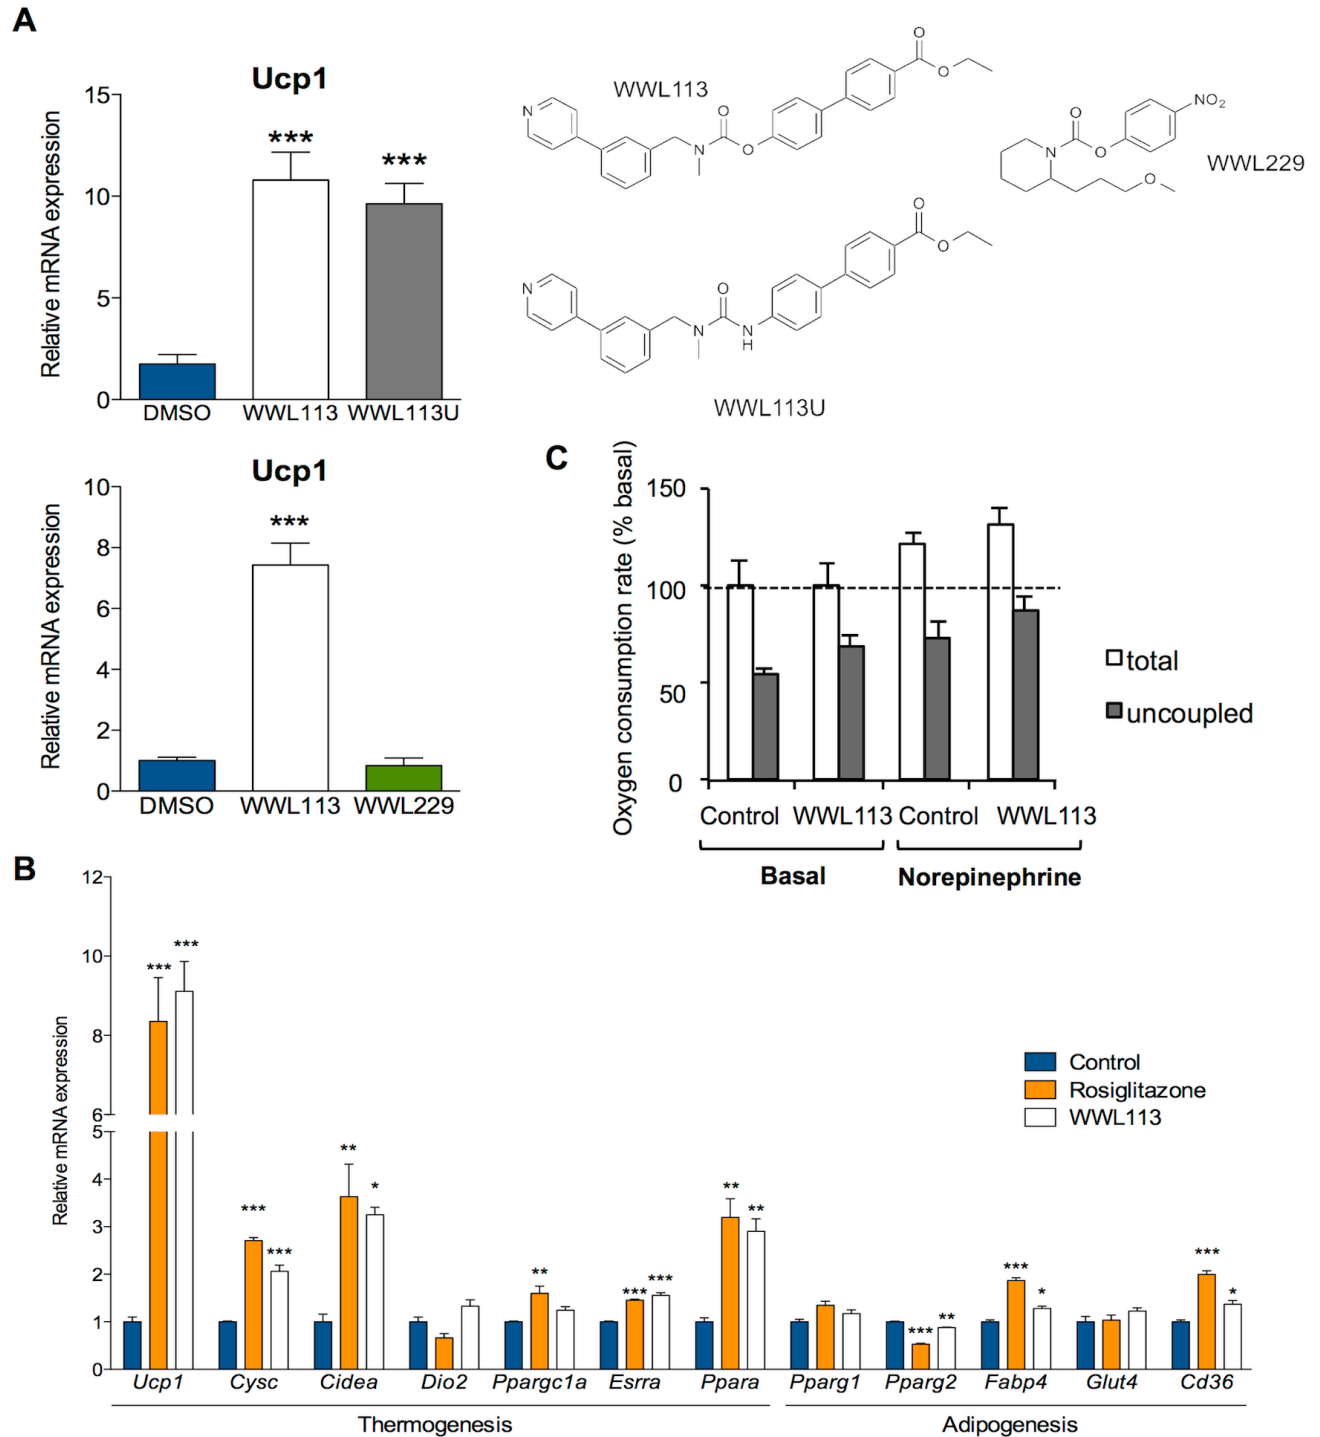

**Figure S3 related to Figure 3. Induction of *Ucp1* expression and cellular respiration by WWL113 is not mediated by *Ces3* inhibition**

**A.** *Ucp1* mRNA in differentiated primary brown adipocytes treated with WWL113, WWL113U or WWL229 (all at 10  $\mu$ M) for 24 hr. WWL113 and WWL229 inhibit *Ces3*, while WWL113U does not (n=4). Structures are shown on the right. \*\*\*  $P < 0.001$  vs. control.

**B:** Gene expression in differentiated primary brown adipocytes treated with vehicle, WWL113 (10  $\mu$ M) or rosiglitazone (0.5  $\mu$ M) for 48 hr (n=3). \*  $P < 0.05$ , \*\*  $P < 0.01$ , \*\*\*  $P < 0.001$  vs. control.

**C:** Total and uncoupled (oligomycin-insensitive) respiration measured in differentiated brown adipocytes ( $5 \times 10^5$  cells/sample) treated with WWL113 (10  $\mu$ M) in the presence or absence of norepinephrine (0.1  $\mu$ M) (n=3-4). Data is expressed as relative to basal for each condition. \*  $P < 0.05$  vs. control.

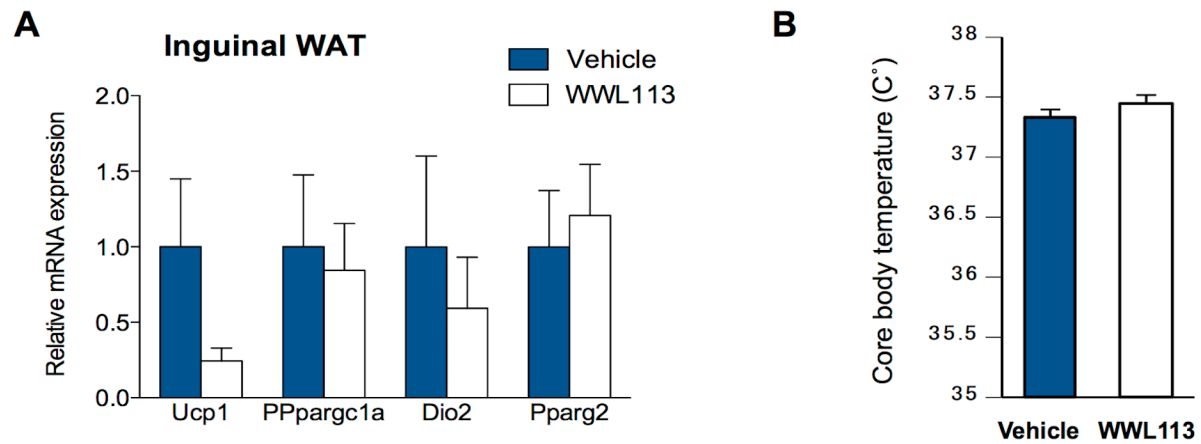

**Figure S4 related to Figure 5. WWL113 does not enhance *Ucp1* expression in inguinal WAT**

**A:** Expression of thermogenic genes in inguinal WAT of C57BL/6 mice treated daily with WWL113 (50 mg/kg) or vehicle for 5 days (n=5).

**B:** Core body temperature in wild-type mice treated with vehicle or WWL113 (50 mg/kg) for 7 days (n=6).

**Supplementary Table related to Experimental Procedures: Primer sequences**

| <b>Gene Id</b>                    | <b>Forward primer</b>     | <b>Reverse Primer</b>      |
|-----------------------------------|---------------------------|----------------------------|
| <i>Adipoq</i>                     | GCACTGGCAAGTTCTACTGCAA    | GTAGGTGAAGAGAACGGCCTTGT    |
| <i>Cidea</i>                      | ATCACAACTGGCCTGGTTACG     | TACTACCCGGTGTCCATTTCT      |
| <i>Cox7a1</i>                     | CAGCGTCATGGTCAGTCTGT      | AGAAAACCGTGTGGCAGAGA       |
| <i>Dio2</i>                       | CAGTGTGGTGCACGTCTCCAATC   | TGAACCAAAGTTGACCACCAG      |
| <i>Fabp4</i>                      | ACACCGAGATTTTCCTTCAAACCTG | CCATCTAGGGTTATGATGCTCTTCA  |
| <i>Pparg</i>                      | GTGCCAGTTTCGATCCGTAGA     | GGCCAGCATCGTGTAGATGA       |
| <i>Ppargc1a</i>                   | AGCCGTGACCACTGACAACGAG    | GCTGCATGGTTCTGAGTGCTAAG    |
| <i>Prdm16</i>                     | GGCGAGGAAGCTAGCCAAA       | GGTCTCCTCCTCGGCACTCT       |
| <i>Tbp</i>                        | ACCCTTCACCAATGACTCCTATG   | TGACTGCAGCAAATCGCTTGG      |
| <i>Ucp1</i>                       | CACCTTCCCGCTGGACACT       | CCCTAGGACACCTTTATACCTAATGG |
| <i>Ucp1-luciferase genotyping</i> | CATGAACGGCCACGAGTT        | TGACGGCCATGTTGTTGT         |
